# Supplementary material for: A Robust 6-lncRNA Prognostic Signature for Predicting the Prognosis of Patients With Colorectal Cancer Metastasis
Source: Front Med (Lausanne). 2020 Mar 6;7:56. doi: 10.3389/fmed.2020.00056 (PMC7068734; doi:10.3389/fmed.2020.00056)
Supplement: Supplementary Table 2 — The 18 differentially expressed lncRNAs associated with prognosis of colorectal cancer metastasis. [file Table_2.XLSX]

## Sheet: COREAD_DElnc_sur
LncRNA	P-value
CECR7	4.01e-05
FUT8.AS1	0.00250015
HOTAIR	0.0441555
LINC00534	0.0259703
LINC00942	0.0450082
LINC01553	0.00338899
LINC01602	0.0026837
LINC01871	0.0400792
LINC01962	0.00216618
LINC02204	0.0441287
LINC02600	0.00510599
NBAT1	0.0233232
PINK1.AS	0.000457834
RUVBL1.AS1	0.0377649
SMAD9.IT1	0.0147697
TEX41	0.030786
TPT1.AS1	0.019171
TRG.AS1	0.0295457
